# Supplementary material for: Chemotaxonomy for female feeding stages of the diseases vector tick Rhipicephalus annulatus (Acari: Ixodidae) based on cuticle hydrocarbons
Source: Research Square preprint supplement (doi:10.21203/rs.3.rs-2934529/v1), 2023-05-19
Supplement: Supplementary file 1 [file 0ec9207d4008f74be1e7de60.docx]

**Table 1: Hydrocarbons detected in different feeding stages of *Rhipicephalus* *annulatus* females.**

| **No.** | **Name** | **Chemical formula** | **Unfed** | **Semifed** | **Engorged** |
| --- | --- | --- | --- | --- | --- |
| **Concentration %, Retention time RT** | | |
| **1** | **Heneicosane** | **C21H44** | 0.81 ± 0.12  (10.112) | 0.56 ± 0.28  (10.129) | 1.264 ± 0.21  (10.335) |
| **2** | **Hexane, 2,3,4-trimethyl-** | **C9H20** | 2.45 ± 0.27  (10.324) | 1.77 ± 0.12  (10.335) | **ـــــــــــــــــــــــــ** |
| **3** | **Heptadecane** | **C17H36** | 0.99 ± 0.15  (10.604) | 0.70 ± 0.36  (10.621) | **ــــــــــــــــــــــــــ** |
| **(4)*** | **Phenanthrene, 9-ethyl-**** | **C16H14** | **XXX** | 4.78 ± 0.28  (10.799) | **ــــــــــــــــــــــــــ** |
| **Heneicosane** | **C21H44** | **XXX** | **ــــــــــــــــــــــــــ** | 1.33 ± 0.75  (11.6) |
| **5** | **Nonadecane** | **C19H40** | 0.60 ± 0.09  (10.982) | 0.51 ± 0.27  (10.999) | **ــــــــــــــــــــــــــ** |
| **6** | **2-methyloctacosane** | **C29H60** | 0.53 ± 0.09  (11.022) | 0.57 ± 0.29  (11.039) | **ــــــــــــــــــــــــــ** |
| **7** | **Eicosane** | **C19H40** | 0.50 ± 0.09  (11.159) | 0.61 ± 0.31  (11.176) | 0.49 ± 0.20  (12.332) |
| **8** | **Eicosane** | **C19H40** | 0.70 ± 0.13  (11.251) | 0.79 ± 0.36  (11.274) | 1.03 ± 0.54  (12.555) |
| **9** | **Hexadecane, 2,6,10,14-tetramethyl-** | **C20H42** | 0.74 ± 0.14  (11.337) | **ــــــــــــــــــــــــــ** | 1.38 ± 1.51  (12.721) |
| **10** | **Octacosane** | **C28H58** | 0.88 ± 0.17  (11.417) | **ــــــــــــــــــــــــــ** | 1.20 ± 0.61  (12.933) |
| **11** | **Eicosane** | **C19H40** | 0.69 ± 0.05  (11.463) | **ــــــــــــــــــــــــــ** | 0.64 ± 0.01  (13.185) |
| **12** | **Eicosane** | **C19H40** | 1.30 ± 0.32  (11.543) | 1.12 ± 0.11  (11.56) | 1.44 ± 0.56  (13.58) |
| **13** | **Nonane, 5-butyl-** | **C28H58** | 2.26 ± 0.42  (11.588) | 2.04 ± 1.03  (11.605) | **ــــــــــــــــــــــــــ** |
| **14** | **Hexadecane** | **C16H34** | 1.27 ± 0.32  (11.64) | 1.24 ± 0.12  (11.657) | **ــــــــــــــــــــــــــ** |
| **15** | **Dodecane, 2,6,11-trimethyl-** | **C15H32** | 1.79 ± 0.35  (11.829) | **ــــــــــــــــــــــــــ** | 0.82 ± 0.01  (12.321) |
| **16** | **Eicosane** | **C19H40** | 1.40 ± 1.00  (11.943) | **ــــــــــــــــــــــــــ** | 0.84 ± 0.64  (14.009) |
| **17** | **Nonadecane, 9-methyl-** | **C20H42** | **ــــــــــــــــــــــــــ** | 1.56 ± 0.23  (12.338) | 1.69 ± 1.09  (14.461) |
| **18** | **Decane, 3,8-dimethyl-** | **C12H26** | 1.21 ± 0.33  (12.315) | 0.72 ± 0.13  (12.424) | 1.21 ± 0.32  (14.638) |
| **(19)*** | **Undecane, 4,6-dimethyl-**** | **C13H28** | 1.18 ± 0.70  (12.401) | **ــــــــــــــــــــــــــ** | **ــــــــــــــــــــــــــ** |
| **Eicosane** | **C19H40** | **ــــــــــــــــــــــــــ** | 1.53 ± 0.12  (12.561) | **ــــــــــــــــــــــــــ** |
| **Decane, 3,8-dimethyl-** | **C12H26** | **ــــــــــــــــــــــــــ** | **ــــــــــــــــــــــــــ** | 0.81 ± 0.41  (14.758) |
| **20** | **Hexacosane** | **C26H54** | 1.48 ± 0.49  (12.538) | **ــــــــــــــــــــــــــ** | 2.40 ± 0.88  (14.873) |
| **21** | **Eicosane** | **C19H40** | 0.85 ± 0.12  (12.595) | 2.29 ± 2.06  (12.727) | **ــــــــــــــــــــــــــ** |
| **22** | **Decane, 3,8-dimethyl-** | **C12H26** | 1.85 ± 1.70  (12.647) | 1.43 ± 0.94  (12.939) | **ــــــــــــــــــــــــــ** |
| **23** | **Decane, 3,8-dimethyl-** | **C12H26** | 2.61 ± 1.28  (12.704) | 0.95 ± 0.16  (12.984) | 1.11 ± 0.03  (15.502) |
| **24** | **Octacosane** | **C28H58** | 1.25 ± 0.35  (12.916) | 0.74 ± 0.22  (13.122) | **ــــــــــــــــــــــــــ** |
| **25** | **Tetratetracontane** | **C44H90** | 0.90 ± 0.58  (12.956) | **ــــــــــــــــــــــــــ** | 1.92 ± 0.47  (16.017) |
| **26** | **Hentriacontane** | **C31H64** | 1.12 ± 0.60  (13.099) | 0.71 ± 0.63  (13.208) | **ــــــــــــــــــــــــــ** |
| **(27)*** | **Octacosane** | **C28H58** | 1.68 ± 1.40  (13.156) | **ــــــــــــــــــــــــــ** | **ــــــــــــــــــــــــــ** |
| **Hexacosane** | **C26H54** | **ــــــــــــــــــــــــــ** | 1.27 ± 0.62  (13.585) | **ــــــــــــــــــــــــــ** |
| **3-Eicosene, (E)-**** | **C20H40** | **ــــــــــــــــــــــــــ** | **ــــــــــــــــــــــــــ** | 4.93 ± 1.03  (16.223) |
| **28** | **Octacosane** | **C28H58** | 1.05 ± 0.70  (13.357) | 0.90 ± 0.49  (13.671) | 1.05 ± 0.09  (16.378) |
| **29** | **Eicosane** | **C19H40** | 2.41 ± 0.80  (13.557) | 1.70 ± 1.18  (13.728) | **ــــــــــــــــــــــــــ** |
| **(30)*** | **Pentacosane**** | **C25H52** | 3.76 ± 1.02  (13.706) | **ــــــــــــــــــــــــــ** | **ــــــــــــــــــــــــــ** |
| **Octacosane** | **C28H58** | **ــــــــــــــــــــــــــ** | 1.45 ± 0.25  (13.917) | **ــــــــــــــــــــــــــ** |
| **17,21-Dimethylheptatriacontane**** | **C39H80** | **ــــــــــــــــــــــــــ** | **ــــــــــــــــــــــــــ** | 1.76 ± 0.01  (15.582) |
| **(31)*** | **Eicosane, 10-methyl-**** | **C21H44** | 1.54 ± 0.31  (13.894) | **ــــــــــــــــــــــــــ** | **ــــــــــــــــــــــــــ** |
| **2-Methylhexacosane**** | **C27H56** | **ــــــــــــــــــــــــــ** | 1.99 ± 2.64  (14.037) | **ــــــــــــــــــــــــــ** |
| **5-Eicosene, (E)-**** | **C20H40** | **ــــــــــــــــــــــــــ** | **ــــــــــــــــــــــــــ** | 5.72 ± 0.02  (14.089) |
| **32** | **Octacosane** | **C28H58** | 2.58 ± 0.94  (14.009) | **ــــــــــــــــــــــــــ** | 2.57 ± 0.02  (15.771) |
| **(33)*** | **Triacontane**** | **C30H62** | 2.21 ± 2.26  (14.438) | **ــــــــــــــــــــــــــ** | **ــــــــــــــــــــــــــ** |
| **Hentriacontane** | **C31H64** | **ــــــــــــــــــــــــــ** | 1.11 ± 0.37  (14.644) | **ــــــــــــــــــــــــــ** |
| **Octacosane** | **C28H58** | **ــــــــــــــــــــــــــ** | **ــــــــــــــــــــــــــ** | 4.51 ± 3.67  (15.943) |
| **34** | **Docosane** | **C22H46** | **ــــــــــــــــــــــــــ** | 1.09 ± 0.87  (14.77) | 6.94 ± 7.71  (16.017) |
| **35** | **Octacosane** | **C28H58** | **ــــــــــــــــــــــــــ** | 3.23 ± 0.31  (14.810) | 5.84 ± 0.01  (16.229) |
| **36** | **Tetracosane** | **C24H50** | **ــــــــــــــــــــــــــ** | 4.40 ± 1.51  (14.878) | 2.01 ± 1.52  (16.275) |
| **37** | **Tetracosane** | **C24H50** | **ــــــــــــــــــــــــــ** | 1.84 ± 1.49  (15.205) | 2.97 ± 1.49  (16.361) |
| **38** | **Tetracosane** | **C24H50** | 3.49 ± 2.60  (14.850) | **ــــــــــــــــــــــــــ** | 0.76 ± 0.15  (16.761) |
| **39** | **Tetracosane** | **C24H50** | 0.41 ± 0.09  (15.170) | 5.15 ± 3.03  (15.468) | **---** |
| **(40)*** | **Hexacosane** | **C26H54** | 3.41 ± 2.60  (15.245) | **ــــــــــــــــــــــــــ** | **---** |
| **Tetracosane** | **C24H50** | **ــــــــــــــــــــــــــ** | 3.64 ± 4.43  (15.514) | **---** |
| **41** | **Tetracosane** | **C24H50** | 2.64 ± 1.70  (15.359) | 6.51 ± 1.96  (15.657) | **---** |
| **42** | **Tetracosane** | **C24H50** | 3.34 ± 3.88  (15.434) | 8.64 ± 4.21  (15.954) | **---** |
| **(43)*** | **3-Methylhexacosane**** | **C7H16** | 1.06 ± 0.40  (15.474) | **ــــــــــــــــــــــــــ** | **---** |
| **Tricosane**** | **C23H48** | **ــــــــــــــــــــــــــ** | 3.26 ± 1.79  (16.029) | **---** |
| **(44)*** | **Hexadecane, 2,6,10,14-tetramethyl-** | **C20H42** | 1.74 ± 2.04  (15.519) | **ــــــــــــــــــــــــــ** | **---** |
| **Tetracosane** | **C24H50** | **ــــــــــــــــــــــــــ** | 5.42 ± 3.021  (16.246) | **---** |
| **(45)*** | **Decane, 3,8-dimethyl-** | **C12H26** | 1.55 ± 1.40  (15.565) | **ــــــــــــــــــــــــــ** | **---** |
| **9-Eicosene, (E)-**** | **C20H40** | **ــــــــــــــــــــــــــ** | 3.43 ± 2.64  (16.389) | **---** |
| **(46)*** | **Hexadecane, 2,6,10,14-tetramethyl-** | **C20H42** | 2.83 ± 1.77  (15.622) | **---** | **---** |
| **(47)*** | **2-Methylpentacosane**** | **C26H54** | 2.00 ± 1.71  (15.851) | **---** | **---** |
| **(48)*** | **Squalane**** | **C₃₀H₅₀** | 1.32 ± 0.30  (15.92) | **---** | **---** |
| **(49)*** | **3-Methyloctacosane**** | **C29H60** | 3.32 ± 0.96  (15.989) | **---** | **---** |
| **(50)*** | **Tetracosane** | **C24H50** | 2.68 ± 1.70  (16.069) | **---** | **---** |
| **(51)*** | **Cycloeicosane**** | **C20H40** | 3.23 ± 1.90  (16.206) | **---** | **---** |
| **(52)*** | **2-Methylhentriacontane**** | **C32H66** | 1.17 ± 0.74  (16.298) | **---** | **---** |
| **(53)*** | **Dodecane**** | **C12H26** | 3.63 ± 0.98  (16.349) | **---** | **---** |

ــــــــــــــــــــــــــ ; The compound hydrocarbon probabilities don’t match with the others in 2 stages.

XXXX; Not hydrocarbon compound

---; The compound doesn’t appear (completely absent) Not detected.

( )*; Specific peaks containing different compound names to each stage.

**; specific compound name.
